# Supplementary material
Source: PubMed Central journal article supplement (PMC3819422)
Supplement: NIHMS509353-supplement-supplement_1.pdf [file NIHMS509353-supplement-supplement_1.pdf]

## Supplemental Tables

| Protein target                                | PDB id | Inhibitor molecular weight (Da) | Potency ( $\mu\text{M}$ ) | Ligand efficiency (kcal/mol per heavy atom) | $\theta_{\text{lig}}$ |
|-----------------------------------------------|--------|---------------------------------|---------------------------|---------------------------------------------|-----------------------|
| $\beta$ II tryptase                           | 2bm2   | 402                             | 0.015                     | 0.35                                        | 0.56                  |
| penicillin G acylase                          | 1gm8   | 350                             | 16                        | 0.27                                        | 0.46                  |
| urokinase                                     | 1owe   | 291                             | 0.63                      | 0.38                                        | 0.41                  |
| ADAM33                                        | 1r55   | 331                             | 0.16                      | 0.40                                        | 0.39                  |
| $\beta$ -lactamase                            | 112s   | 318                             | 26                        | 0.33                                        | 0.39                  |
| factor Xa                                     | 1lpz   | 467                             | 0.025                     | 0.32                                        | 0.38                  |
| Chk1                                          | 2br1   | 391                             | 15.4                      | 0.23                                        | 0.38                  |
| NS5B polymerase                               | 1yvf   | 438                             | 0.1                       | 0.34                                        | 0.38                  |
| factor VIIa                                   | 1ygc   | 548                             | 0.00035                   | 0.34                                        | 0.37                  |
| vascular endothelial growth factor receptor 2 | 1y6b   | 479                             | 0.038                     | 0.30                                        | 0.37                  |
| tRNA-guanine transglycosylase                 | 1n2v   | 208                             | 83                        | 0.37                                        | 0.36                  |
| tryptophan synthase                           | 1k3u   | 290                             | -NR-                      | -NR-                                        | 0.36                  |
| cyclin-dependent kinase 2                     | 1ke5   | 329                             | 0.56                      | 0.37                                        | 0.35                  |
| thymidine kinase                              | 1ofl   | 252                             | 4.1                       | 0.41                                        | 0.34                  |
| thyroid hormone receptor $\alpha$ 1           | 1nav   | 355                             | 0.025                     | 0.45                                        | 0.34                  |
| neuraminidase B                               | 1vcj   | 351                             | 26                        | 0.25                                        | 0.34                  |
| thymidine phosphorylase                       | 1uou   | 245                             | 0.02                      | 0.65                                        | 0.34                  |
| neuraminidase A                               | 117f   | 330                             | 0.0008                    | 0.54                                        | 0.33                  |
| c-Abl tyrosine kinase                         | 1opk   | 427                             | 0.00015                   | 0.46                                        | 0.33                  |
| protein kinase 5                              | 1v0p   | 433                             | 0.13                      | 0.31                                        | 0.33                  |
| progesterone receptor                         | 1sqn   | 298                             | 0.0004                    | 0.58                                        | 0.33                  |
| p38 kinase                                    | 1ywr   | 475                             | 0.032                     | 0.29                                        | 0.33                  |
| androgen receptor                             | 1z95   | 430                             | 0.076                     | 0.33                                        | 0.33                  |
| thyroid hormone receptor $\beta$ 1            | 1n46   | 367                             | 0.00003                   | 0.53                                        | 0.32                  |
| purine nucleoside phosphorylase               | 1v48   | 337                             | 0.0069                    | 0.50                                        | 0.32                  |
| estrogen receptor $\alpha$                    | 1sj0   | 466                             | 0.0008                    | 0.37                                        | 0.32                  |
| thymidylate kinase                            | 1w2g   | 242                             | 27                        | 0.37                                        | 0.32                  |
| c-Jun terminal kinase 3                       | 1pmn   | 487                             | 0.007                     | 0.34                                        | 0.32                  |
| glucokinase                                   | 1v4s   | 349                             | 1000                      | 0.18                                        | 0.32                  |
| phosphodiesterase 5A                          | 1xoz   | 389                             | 0.0012                    | 0.42                                        | 0.31                  |
| myosin II                                     | 1yv3   | 292                             | 4.9                       | 0.33                                        | 0.31                  |
| c-kit tyrosine kinase                         | 1t46   | 496                             | 0.413                     | 0.23                                        | 0.30                  |
| heat shock protein 90                         | 2bsm   | 388                             | 0.14                      | 0.34                                        | 0.30                  |
| thrombin                                      | 1oyt   | 408                             | 0.057                     | 0.33                                        | 0.30                  |
| cyclin-dependent kinase 5                     | 1unl   | 354                             | 0.2                       | 0.35                                        | 0.30                  |
| glucocorticoid receptor                       | 1m2z   | 392                             | 0.06                      | 0.35                                        | 0.29                  |

|                                      |      |     |         |      |      |
|--------------------------------------|------|-----|---------|------|------|
| glutamate receptor 6                 | 1tt1 | 215 | 64.6    | 0.38 | 0.29 |
| vitamin D nuclear receptor           | 1s19 | 413 | 0.0017  | 0.40 | 0.28 |
| glycogen synthase kinase 3 $\beta$   | 1q41 | 277 | 0.022   | 0.50 | 0.28 |
| activated Cdc42 kinase 1             | 1u4d | 245 | -NR-    | -NR- | 0.28 |
| transthyretin                        | 1tz8 | 268 | -NR-    | -NR- | 0.27 |
| adipocyte fatty acid-binding protein | 1tow | 253 | 0.57    | 0.45 | 0.27 |
| dihydrofolate reductase              | 1s3v | 375 | 0.038   | 0.37 | 0.27 |
| acetylcholinesterase                 | 1gpk | 244 | 4.3     | 0.41 | 0.27 |
| HIV-1 reverse transcriptase          | 1jla | 364 | -NR-    | -NR- | 0.26 |
| HIV-1 protease                       | 1kzk | 576 | 0.00004 | 0.34 | 0.24 |

**Table S1: Inhibitors bound to traditional targets, a subset of the Astex set.** Potency is taken from reported  $K_d$  or  $K_i$  values where available; if unavailable,  $IC_{50}$  values were used instead. In several cases (“-NR-”), no measure of potency has been reported.  $\theta_{lig}$  indicates the fraction of ligand SASA exposed in the complex, as defined in Equation 1.

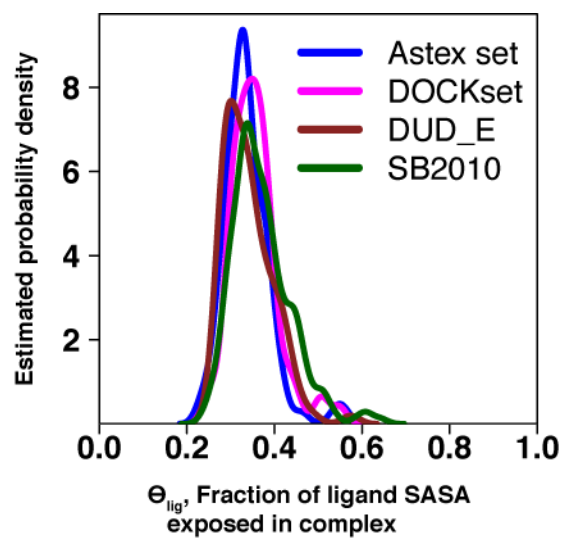

**Figure S1 (complements Figure 1)** The distribution of the extent of inhibitor solvent exposure ( $\theta_{\text{lig}}$ ) is similar across a number of drug-like sets: Astex<sup>27</sup> (*blue*), DOCK<sup>54</sup> (*magenta*), DUD-E<sup>29</sup> (*brown*), and SB2010<sup>30</sup> (*green*).

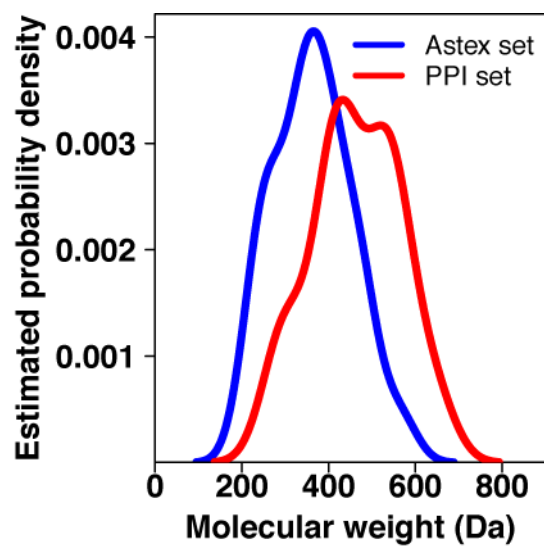

**Figure S2 (complements Figure 2)** The distribution of molecular weights for the inhibitors in each set underlies the observed difference in ligand efficiencies. Inhibitors binding at protein interaction sites (*red*, *median value 475 Da*) are typically larger than their drug-like counterparts (*blue*, *median value 355 Da*), and the difference in the means is statistically significant ( $p < 10^{-4}$ ).

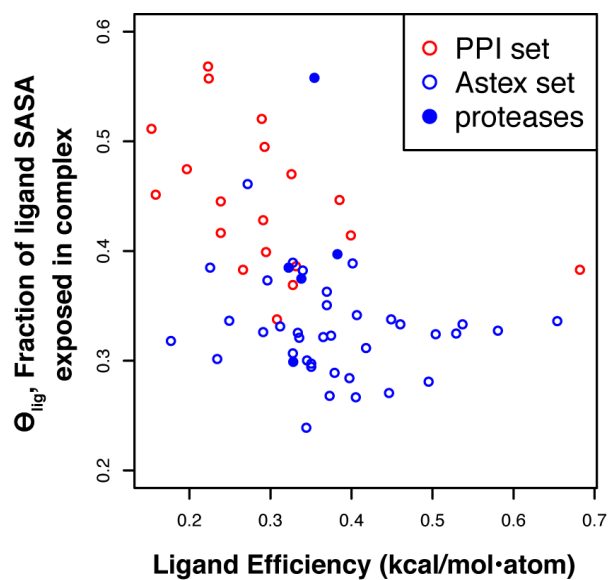

**Figure S3 (complements Figure 2)** The relationship between  $\theta_{\text{lig}}$  and ligand efficiency for both the PPI set and the Astex set. While there is a statistically significant negative correlation between these properties for the PPI set (as noted in **Figure 2c**), no statistically significant correlation exists for the Astex set ( $p = 0.27$ ).

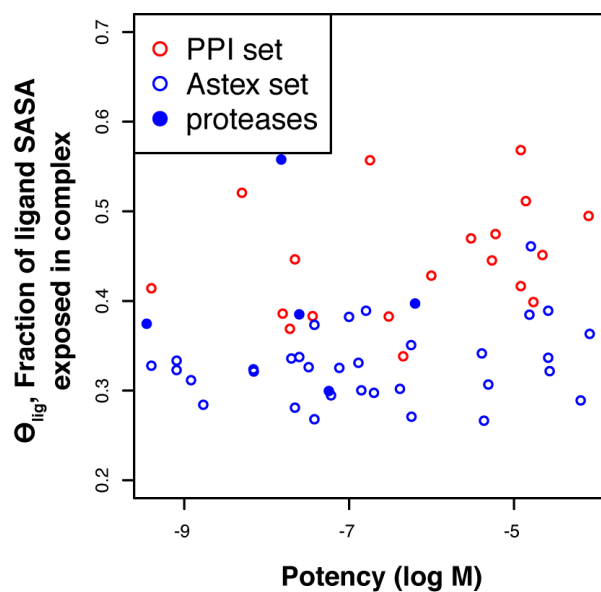

**Figure S4 (complements Figure 2)** The relationship between  $\theta_{\text{lig}}$  and potency for both the PPI set and the Astex set. No statistically significant correlation exists between these properties for either set ( $p = 0.33$  for the PPI set,  $p = 0.50$  for the Astex set).

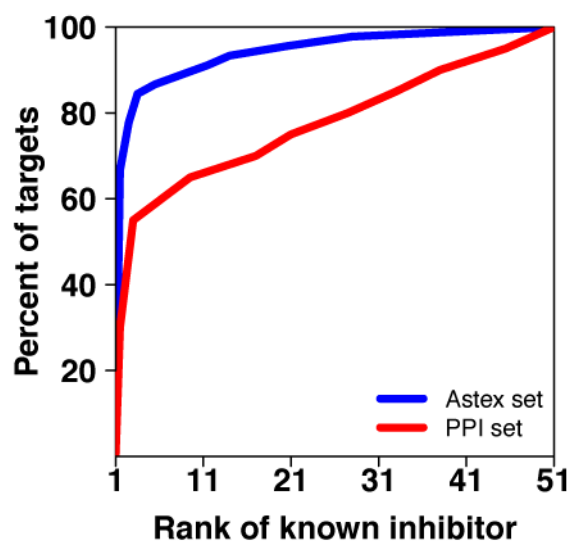

**Figure S5 (complements Figure 3)** A known inhibitor was embedded in a custom set of 50 “decoy” compounds selected by the DUD-E server to match the physical properties of the known inhibitor. FRED exhibits superior ability to identify the known drug-like inhibitors from the decoy compounds (*blue*), relative to inhibitors that bind at protein interaction sites (*red*), and the difference in the means is statistically significant ( $p < 0.002$ ).

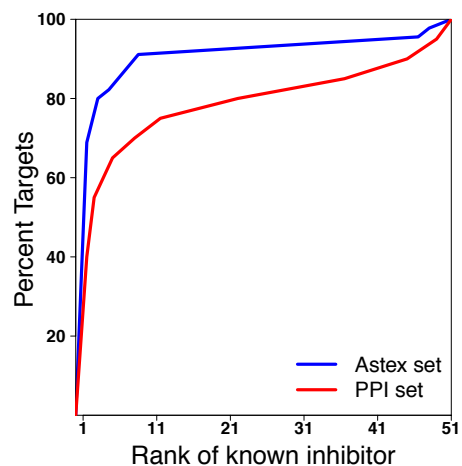

**Figure S6 (complements Figure 3)** The observation that virtual screening at protein interaction sites performs less well than for drug-like compounds holds for other docking software as well. DOCK 6.6 was used to identify a known inhibitor embedded in a custom set of 50 “decoy” compounds selected by the DUD-E server to match the physical properties of the known inhibitor. DOCK 6.6 exhibits superior ability to identify the known drug-like inhibitors from the decoy compounds (*blue*), relative to inhibitors that bind at protein interaction sites (*red*), though this difference is not statistically significant ( $p = 0.11$ ).
